# Erratum

The following material was inadvertently omitted from the article titled, "Role of Experimental Socks in the Care of the High-Risk Diabetic Foot: A Multicenter Patient Evaluation Study," by H.J. Murray et al., 16:1190–92, 1993. The following investigators participated in the study:

Lee Sanders, DPM, VA Medical Center, Lebanon, PA

Steve Rith-Najarian, MD, Red Lake Center Indian Reservation, Bemidje, MN

Elizabeth S. Hawkins, DPM, Gillis W. Long Hansen's Disease Center, Carville, LA

Joyce Van Winkle et al., Californian College of Podiatric Medicine, San Francisco, CA

Richard Stess, DPM, VA Medical Center, San Francisco, CA

Steve Albert, DPM, VA Medical Center, Denver, CO
